# Supplementary material for: Co-regulated gene expression by oestrogen receptor α and liver receptor homolog-1 is a feature of the oestrogen response in breast cancer cells
Source: PubMed Central journal article supplement (PMC3905875; doi:10.1093/nar/gkt827), 2013-09-17
Supplement: supp_gkt827_nar-01711-x-2013-File008.pdf [file supp_gkt827_nar-01711-x-2013-File008.pdf]

|                       | ChIP against   | Total tag count | Number of tags after filtering | Percentage of tags after filtering | Number of called peaks |
|-----------------------|----------------|-----------------|--------------------------------|------------------------------------|------------------------|
| <b>Rep1 siControl</b> | <i>ERα</i>     | 25070841        | 22585368                       | 90.1                               | 46913                  |
| <b>Rep1 siLRH1</b>    | <i>ERα</i>     | 20877689        | 19740866                       | 94.6                               | 31748                  |
| <b>Rep2 siControl</b> | <i>ERα</i>     | 24363924        | 22466024                       | 92.2                               | 31934                  |
| <b>Rep2 siLRH1</b>    | <i>ERα</i>     | 19206354        | 17816547                       | 92.8                               | 35637                  |
| <b>Rep1 Control</b>   | <i>ERα</i>     | 24936940        | 24285478                       | 97.4                               | 32808                  |
| <b>Rep1 HA-LRH1</b>   | <i>ERα</i>     | 25169008        | 24737818                       | 98.3                               | 27178                  |
| <b>Rep2 Control</b>   | <i>ERα</i>     | 22829742        | 19127352                       | 83.8                               | 85660                  |
| <b>Rep2 HA-LRH1</b>   | <i>ERα</i>     | 24729358        | 22481763                       | 90.9                               | 76557                  |
| <b>Rep1 Control</b>   | <i>HA-LRH1</i> | 25466376        | 25415163                       | 99.8                               | 556                    |
| <b>Rep1 HA-LRH1</b>   | <i>HA-LRH1</i> | 24517660        | 24411661                       | 99.6                               | 10270                  |
| <b>Rep2 Control</b>   | <i>HA-LRH1</i> | 12619838        | 12202611                       | 96.7                               | 186                    |
| <b>Rep2 HA-LRH1</b>   | <i>HA-LRH1</i> | 6718673         | 6585960                        | 98                                 | 12229                  |

Supplementary Figure 1. Details of ChIP-sequencing runs. Included are the Immunoprecipitated proteins (ChIP against), the total number of tag counts, the number and relative percentage of tags left after filtering and the number of called peaks.

| LRH-1 Unique Sites                                                                  | Consensus  | Occurrences | Cut-off | Z-score | p-value  |
|-------------------------------------------------------------------------------------|------------|-------------|---------|---------|----------|
| 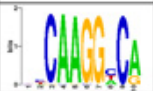   | SYGAAGGHCA | 3379        | -0.206  | -38.54  | >1.0E-30 |
|    | 5C1AGG1C1  | 3298        | 2.397   | -37.50  | >1.0E-30 |
|    | 6CA1GG1C3  | 3331        | 1.737   | -37.49  | >1.0E-30 |
|    | AAGGCCA    | 3046        | 3.212   | -33.58  | >1.0E-30 |
|    | YCAAGGH    | 2994        | 6.024   | -31.92  | >1.0E-30 |
|    | CAAGGWC    | 2230        | 5.97    | -30.25  | >1.0E-30 |
|    | STGWCCT    | 2177        | 6.739   | -20.82  | >1.0E-30 |
|   | CASRGCC    | 3362        | 1.554   | -13.10  | >1.0E-30 |
|  | SGC5GCS    | 3240        | -2.079  | -12.71  | >1.0E-30 |
|  | 4G2G1C3GC1 | 3381        | -5.546  | -11.99  | >1.0E-30 |
|  | GCWGCCY    | 3381        | -3.156  | -11.12  | 5.2E-29  |

| LRH-1/ESR1 Shared Sites                                                           | Consensus | Occurrences | Cut-off | Z-score | p-value  |
|-----------------------------------------------------------------------------------|-----------|-------------|---------|---------|----------|
| 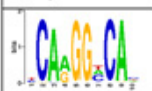 | YCARGGCAS | 1019        | 6.349   | -16.57  | >1.0E-30 |
|  | 4CC1G1CC2 | 1606        | 2.138   | -7.99   | 6.9E-16  |

| ESR1 Unique Sites                                                                 | Consensus  | Occurrences | Cut-off | Z-score | p-value  |
|-----------------------------------------------------------------------------------|------------|-------------|---------|---------|----------|
| 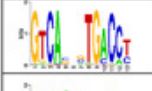 | G1CA4G1C2  | 3091        | 3.78    | -40.00  | >1.0E-30 |
|  | TGACHCA    | 2912        | 3.711   | -20.70  | >1.0E-30 |
|  | TRTTTRYTTW | 3584        | 4.575   | -13.37  | >1.0E-30 |
|  | TRTTTDC    | 2825        | 7.02    | -13.00  | >1.0E-30 |
|  | TRTTTRY    | 4608        | 2.301   | -10.46  | 6.3E-26  |

Supplementary Figure 2. Motif analysis of the shared and unique ER $\alpha$  and LRH-1 binding sites. Binding site analysis was carried out using the Cistrome ([www.cistrome.org](http://www.cistrome.org)), applying the SeqPos motif tool (He, H. H. et al (2010) Nucleosome dynamics define transcriptional enhancers. Nature Genet., 42: 343-347.

|                   | ID             | Transcription Factor | Consensus          | Occurrences | Z-score       | p-value          |
|-------------------|----------------|----------------------|--------------------|-------------|---------------|------------------|
| ESR1 Unique Sites | <b>MA0112</b>  | <b>ESR1</b>          | <b>2G1CA3T2C7</b>  | <b>3001</b> | <b>4.8548</b> | <b>&gt;1E-30</b> |
|                   | MA0258         | ESR2                 | 4GTCA7C2           | 3260        | 4.7987        | >1E-30           |
|                   | M01268         | NR1H4                | RTGACCY            | 3942        | 5.4682        | >1E-30           |
|                   | hPDI020        | ZNF655               | TSACCT             | 3195        | 6.5372        | >1E-30           |
|                   | MA0066         | PPARG                | 4GG6T2CC3          | 1722        | 3.5524        | >1E-30           |
|                   | M01589         | ESRRB                | SSSTGACCTTGR       | 4658        | 2.3732        | >1E-30           |
|                   | M01282         | PPARA                | TGACCTY            | 4232        | 4.9149        | >1E-30           |
|                   | <b>MC00052</b> | <b>TFAP2C</b>        | <b>2CC3GG1C2</b>   | <b>3133</b> | <b>3.7364</b> | <b>&gt;1E-30</b> |
|                   | MC00051        | TFAP2A               | 3CC3GG1C1          | 3154        | 3.7389        | >1E-30           |
|                   | UP00048        | RARA                 | 4TGACC7            | 4377        | 3.0031        | >1E-30           |
|                   | UP00009        | NR2F2                | 4TGACC7            | 4848        | 2.0197        | >1E-30           |
|                   | MA0160         | NR4A2                | GTGACCTT           | 3699        | 5.3612        | >1E-30           |
|                   | <b>MA0148</b>  | <b>FOXA1</b>         | <b>TGTTTRCWYWG</b> | <b>3338</b> | <b>5.2597</b> | <b>&gt;1E-30</b> |
|                   | M00515         | PPARG::RXRA          | 5GG2A3T3C5         | 1408        | -0.12         | >1E-30           |
|                   | M01722         | RORB                 | TGACCYA            | 1336        | 6.5782        | >1E-30           |
|                   | UP00010        | TCFAP2B              | 2GCC4GG3           | 2236        | 4.686         | >1E-30           |
|                   | EN0033         | RXRA                 | TGACCTTGC          | 4991        | 2.7853        | >1E-30           |
|                   | UP00079        | ESRRA                | 7ACCTT5            | 4637        | 2.4315        | >1E-30           |
|                   | MC00023        | FOXA2                | 2T1TTT1C4          | 2408        | 6.0651        | >1E-30           |
|                   | M01267         | FOSL1                | TGAGTCAK           | 1688        | 6.9437        | >1E-30           |
|                   | MC00022        | FOSL2                | TGASTCA            | 1385        | 5.5391        | >1E-30           |
|                   | MC00044        | SMARCC1              | VTGASTCAYC         | 1109        | 7.031         | >1E-30           |
|                   | M01248         | NR0B1                | 7G1CCTT7           | 3371        | 4.8115        | >1E-30           |
|                   | EN0110         | BCL11A               | TGASTMA            | 2179        | 5.6492        | >1E-30           |
|                   | EN0123         | SMARCA4              | VTGASTCABC         | 1067        | 7.2472        | >1E-30           |
|                   | EN0339         | PAX5                 | SHGTSAC            | 3829        | 4.4447        | >1E-30           |
|                   | MC00029        | JUND                 | GATGASTCAY         | 983         | 6.3783        | >1E-30           |
|                   | UP00028        | TCFAP2E              | 3SCC3GG4           | 3748        | 2.7464        | >1E-30           |
|                   | UP00087        | Tcfap2c              | 1T2CC3GG4          | 4130        | 2.5946        | >1E-30           |
|                   | <b>MC00019</b> | <b>FOS</b>           | <b>RTGASTCAYM</b>  | <b>1028</b> | <b>7.1689</b> | <b>&gt;1E-30</b> |
|                   | <b>MC00028</b> | <b>JUN</b>           | <b>GRTGASTCAY</b>  | <b>964</b>  | <b>7.2634</b> | <b>&gt;1E-30</b> |
|                   | <b>EN0245</b>  | <b>GATA3</b>         | <b>GATDWWYATCW</b> | <b>937</b>  | <b>7.1105</b> | <b>&gt;1E-30</b> |
|                   | M01138         | RORA                 | TGACCYANYWW        | 4149        | 3.4512        | >1E-30           |
|                   | UP00005        | Tcfap2a              | 1T2CC3GG4          | 3362        | 3.7697        | >1E-30           |
|                   | M01217         | NR4A1                | YTGACCTTBS         | 4727        | 3.157         | >1E-30           |
|                   | hPDI182        | ZNF71                | TGACCYYT           | 4879        | 2.9129        | >1E-30           |
|                   | MC00005        | RXRG                 | GGTCAAAGGTCA       | 4840        | -2.3163       | >1E-30           |
|                   | M01198         | NR1H2::RXRA          | 1G1T1A1AG4         | 4675        | -3.5555       | >1E-30           |
|                   | M00490         | BACH2                | SRTGAGTCAYS        | 3074        | 4.6755        | >1E-30           |
|                   | M01153         | NR1I2::RXRA          | TGAMCTBY           | 3626        | 5.3709        | >1E-30           |
|                   | M01132         | SF1                  | TGRCCTTGR          | 4853        | 3.595         | >1E-30           |
|                   | M00495         | BACH1                | 4TGAGT6            | 810         | 6.6998        | >1E-30           |
|                   | M01725         | NR2C2,Nr2c2          | CSTGACCTYTS        | 3653        | 4.1886        | >1E-30           |
|                   | EN0271         | SMARCB1              | STGASTCABC         | 1283        | 6.7567        | >1E-30           |
|                   | MA0035         | GATA1                | RSWGATAAGR         | 2566        | 5.8195        | >1E-30           |
|                   | MC00030        | JUND                 | ATGACKY            | 3997        | 3.9566        | >1E-30           |
|                   | EN0365         | SIRT6                | RSWGATAAGR         | 2642        | 5.3143        | >1E-30           |
|                   | EN0272         | SMARCB1              | WGATAAG            | 2676        | 5.6808        | >1E-30           |
|                   | EN0265         | HMGN3                | YYTTATCWSY         | 1793        | 6.3597        | >1E-30           |
|                   | EN0418         | NR2C2                | 1GG2A2GG3          | 4819        | 3.6591        | >1E-30           |
|                   | EN0232         | FOXP2                | GTAACA             | 4211        | 4.7141        | >1E-30           |
|                   | MA0067         | PAX2                 | VMRTGACW           | 3304        | 5.2508        | >1E-30           |
| hPDI075           | THRA           | GTKRCC               | 3082               | 6.277       | >1E-30        |                  |
| M00037            | NFE2           | TGCTGASTCAY          | 4936               | 0.5958      | >1E-30        |                  |
| EN0125            | CCNT2          | YCTTATCWSY           | 1972               | 6.2512      | >1E-30        |                  |
| M00821            | NFE2L2         | 6AGTCA2              | 3303               | 4.353       | >1E-30        |                  |
| M00348            | GATA2          | AGWGATAASA           | 2685               | 5.3694      | >1E-30        |                  |
| MC00043           | SMARCA4        | GATAAGR              | 2794               | 5.762       | >1E-30        |                  |
| M00041            | ATF2::JUN      | TRACGTCA             | 3209               | 3.0744      | >1E-30        |                  |
| M00983            | MAF            | TGCTGAGTCAK          | 1724               | 6.2115      | >1E-30        |                  |
| hPDI045           | ZNF695         | WRACCYT              | 2863               | 6.2288      | >1E-30        |                  |
| EN0002            | ATF3           | 6CGTCA3              | 4978               | 0.1905      | >1E-30        |                  |
| M00526            | NR6A1          | 7TTGA1C5             | 3422               | 0.354       | >1E-30        |                  |
| MA0031            | FOXD1          | GTAACA               | 1756               | 6.5411      | >1E-30        |                  |
| UP00066           | HNF4A          | 5TGACC7              | 4907               | 1.6721      | 1.31E-29      |                  |
| MC00011           | ATF3           | SYCACGTGAC           | 4835               | 2.1847      | 3.26E-29      |                  |
| M00179            | ATF2           | RSTKACGTCSB          | 4911               | -0.354      | 2.62E-28      |                  |
| EN0372            | SP1            | 3CA1AG2C2            | 3319               | 4.8968      | 4.48E-26      |                  |
| MC00010           | FOXJ3          | RTAAACAA             | 2655               | 5.755       | 4.25E-25      |                  |
| hPDI175           | ID2            | GAYGWC               | 2474               | 5.0716      | 4.82E-25      |                  |

Supplementary Figure 3. Motif analysis of ER $\alpha$  unique sites was carried out using a candidate screening, applying the SeqPos motif tool in Cistrome (cistrome.org). Highlighted are motifs described in previous studies as being enriched at ER $\alpha$  binding regions.

|                         | ID             | Transcription Factor | Consensus          | Occurrences         | Z-score          | p-value          |
|-------------------------|----------------|----------------------|--------------------|---------------------|------------------|------------------|
| LRH-1/ESR1 Shared Sites | <b>M01132</b>  | <b>SF1</b>           | <b>YCAAGGYCA</b>   | <b>1721-22.9915</b> | <b>&gt;1E-30</b> | <b>&gt;1E-30</b> |
|                         | M01589         | ESRRB                | SSSTGACCTTGR       | 1769-22.1235        | >1E-30           | >1E-30           |
|                         | M01217         | NR4A1                | YTGACCTTBS         | 1499-20.2321        | >1E-30           | >1E-30           |
|                         | <b>M01142</b>  | <b>NR5A2</b>         | <b>CKRRCCTGVAC</b> | <b>1645-19.293</b>  | <b>&gt;1E-30</b> | <b>&gt;1E-30</b> |
|                         | M01282         | PPARA                | RAGGTCA            | 1599-16.8451        | >1E-30           | >1E-30           |
|                         | MA0160         | NR4A2                | AAGGTCAC           | 1553-16.6283        | >1E-30           | >1E-30           |
|                         | UP00079        | ESRRA                | 7ACCTT5            | 1734-15.8737        | >1E-30           | >1E-30           |
|                         | hPDI020        | ZNF655               | AGGTSA             | 1360-15.6413        | >1E-30           | >1E-30           |
|                         | M01268         | NR1H4                | RGGTCA             | 1544-14.8109        | >1E-30           | >1E-30           |
|                         | M01248         | NR0B1                | 7G1CCTT7           | 1260-14.6607        | >1E-30           | >1E-30           |
|                         | M00526         | NR6A1                | 7TTGA1C5           | 1528-13.1625        | >1E-30           | >1E-30           |
|                         | <b>MA0112</b>  | <b>ESR1</b>          | <b>7G2A3TG1C2</b>  | <b>1102-12.0105</b> | <b>&gt;1E-30</b> | <b>&gt;1E-30</b> |
|                         | EN0033         | RXRA                 | GCAAAGGTCA         | 1772-11.9367        | >1E-30           | >1E-30           |
|                         | MA0258         | ESR2                 | 2G7TGAC4           | 1095-11.218         | 1.66E-29         | 1.66E-29         |
|                         | MC00022        | FOSL2                | TGASTCA            | 568-10.9503         | 3.31E-28         | 3.31E-28         |
|                         | MC00051        | TFAP2A               | 3CC3GG1C1          | 1766-10.569         | 2.08E-26         | 2.08E-26         |
|                         | M01267         | FOSL1                | TGAGTCAK           | 538-10.4929         | 4.66E-26         | 4.66E-26         |
|                         | <b>MC00028</b> | <b>JUN</b>           | <b>GRTGASTCAY</b>  | <b>407-9.9587</b>   | <b>1.16E-23</b>  | <b>1.16E-23</b>  |
|                         | <b>MC00052</b> | <b>TFAP2C</b>        | <b>2CC3GG1C2</b>   | <b>1778-9.8612</b>  | <b>3.07E-23</b>  | <b>3.07E-23</b>  |
|                         | MC00044        | SMARCC1              | GRTGASTCAB         | 438-9.8568          | 3.20E-23         | 3.20E-23         |

Supplementary Figure 4. Motif analysis of LRH-1 and ER $\alpha$  shared sites was carried out using a candidate screening, applying the SeqPos motif tool in Cistrome (cistrome.org). Highlighted are motifs described in previous studies as being enriched at ER $\alpha$  binding regions.

|                    | ID             | Transcription Factor | Consensus           | Occurences  | Z-score         | p-value          |
|--------------------|----------------|----------------------|---------------------|-------------|-----------------|------------------|
| LRH-1 Unique Sites | <b>M01132</b>  | <b>SF1</b>           | <b>TGRCCTTGR</b>    | <b>2803</b> | <b>-36.4651</b> | <b>&gt;1E-30</b> |
|                    | <b>M01142</b>  | <b>NR5A2</b>         | <b>CKRRCCTTGVAC</b> | <b>3117</b> | <b>-32.2572</b> | <b>&gt;1E-30</b> |
|                    | M01217         | NR4A1                | YTGACCTTBS          | 2792        | -31.7033        | >1E-30           |
|                    | M01589         | ESRRB                | SSSTGACCTTGR        | 3041        | -29.7035        | >1E-30           |
|                    | M01282         | PPARA                | RAGGTCA             | 2938        | -24.529         | >1E-30           |
|                    | UP00079        | ESRRA                | 7ACCTT5             | 2602        | -22.0194        | >1E-30           |
|                    | M01248         | NROB1                | 7G1CCTT7            | 2943        | -21.5178        | >1E-30           |
|                    | MA0160         | NR4A2                | AAGGTCAC            | 2770        | -19.8636        | >1E-30           |
|                    | M00526         | NR6A1                | 7TTGA1C5            | 2768        | -16.4063        | >1E-30           |
|                    | hPDI020        | ZNF655               | AGGTSA              | 1868        | -14.9425        | >1E-30           |
|                    | MC00051        | TFAP2A               | 3CC3GG1C1           | 3131        | -14.6209        | >1E-30           |
|                    | M01268         | NR1H4                | RGGTCAY             | 2559        | -14.4778        | >1E-30           |
|                    | MA0146         | ZFX                  | 8GGCCT1             | 3143        | -13.9387        | >1E-30           |
|                    | <b>MC00052</b> | <b>TFAP2C</b>        | <b>2CC3GG1C2</b>    | <b>3045</b> | <b>-13.8407</b> | <b>&gt;1E-30</b> |
|                    | EN0033         | RXRA                 | TGACCTTTGC          | 2013        | -13.6291        | >1E-30           |
|                    | MC00040        | REST                 | 3GGA1AG7            | 3009        | -11.9872        | >1E-30           |
|                    | <b>MC00028</b> | <b>JUN</b>           | <b>GRTGASTCAY</b>   | <b>645</b>  | <b>-11.6578</b> | <b>&gt;1E-30</b> |
|                    | MC00022        | FOSL2                | TGASTCA             | 832         | -11.6153        | >1E-30           |
|                    | MC00044        | SMARCC1              | GRTGASTCAB          | 593         | -11.5513        | >1E-30           |
|                    | hPDI045        | ZNF695               | ARGGTYW             | 1999        | -11.3735        | 2.83E-30         |
|                    | M01253         | CNOT3                | GGCCGCGSSS          | 3149        | -11.2807        | 8.17E-30         |
|                    | EN0271         | SMARCB1              | STGASTCABC          | 497         | -10.9191        | 4.67E-28         |
|                    | M01267         | FOSL1                | TGAGTCAK            | 788         | -10.8526        | 9.69E-28         |
|                    | EN0123         | SMARCA4              | GVTGASTCAB          | 741         | -10.7673        | 2.46E-27         |
|                    | <b>MC00019</b> | <b>FOS</b>           | <b>KRTGASTCAY</b>   | <b>587</b>  | <b>-10.6961</b> | <b>5.31E-27</b>  |

Supplementary Figure 5. Motif analysis of LRH-1 unique sites was carried out using a candidate screening, applying the SeqPos motif tool in Cistrome (cistrome.org). Highlighted are motifs described in previous studies as being enriched at ER $\alpha$  binding regions.

**A**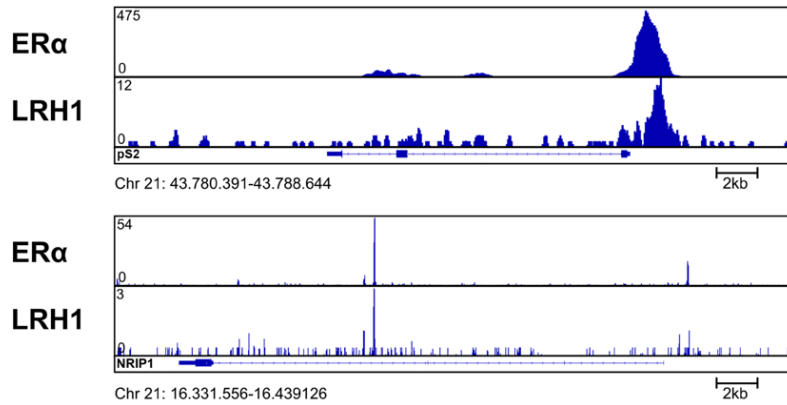**B**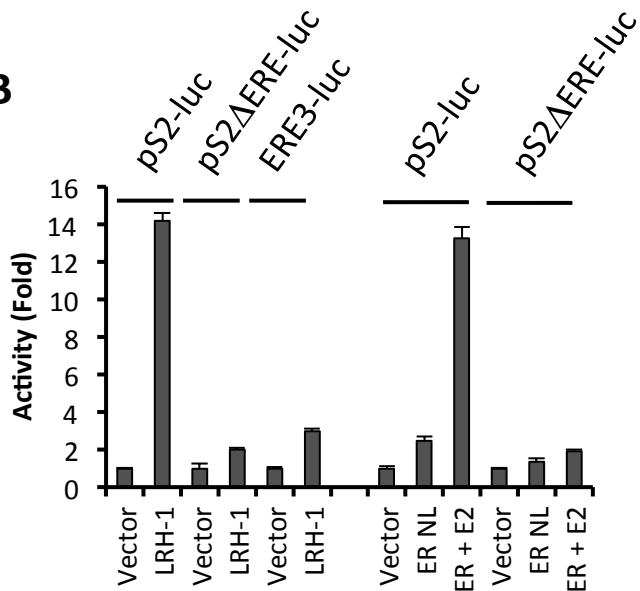

Supplementary Figure 6. (A) Genome browser snapshots of ChIP-seq samples for ER $\alpha$  and LRH-1 on proliferating cells. (B) COS-1 cells, cultured in were transfected with pS2-luc, pS2-luc in which the ERE has been deleted (pS2 $\Delta$ ERE-luc) or ERE3-luc, together with ER $\alpha$  or LRH-1 as indicated. 17 $\beta$ -estradiol (E2; 10 nM) was added where indicated, an equal volume of vehicle being added to the no ligand (NL) controls. Reporter gene activities are shown relative to the vector controls (n=3; error bars = SEM).

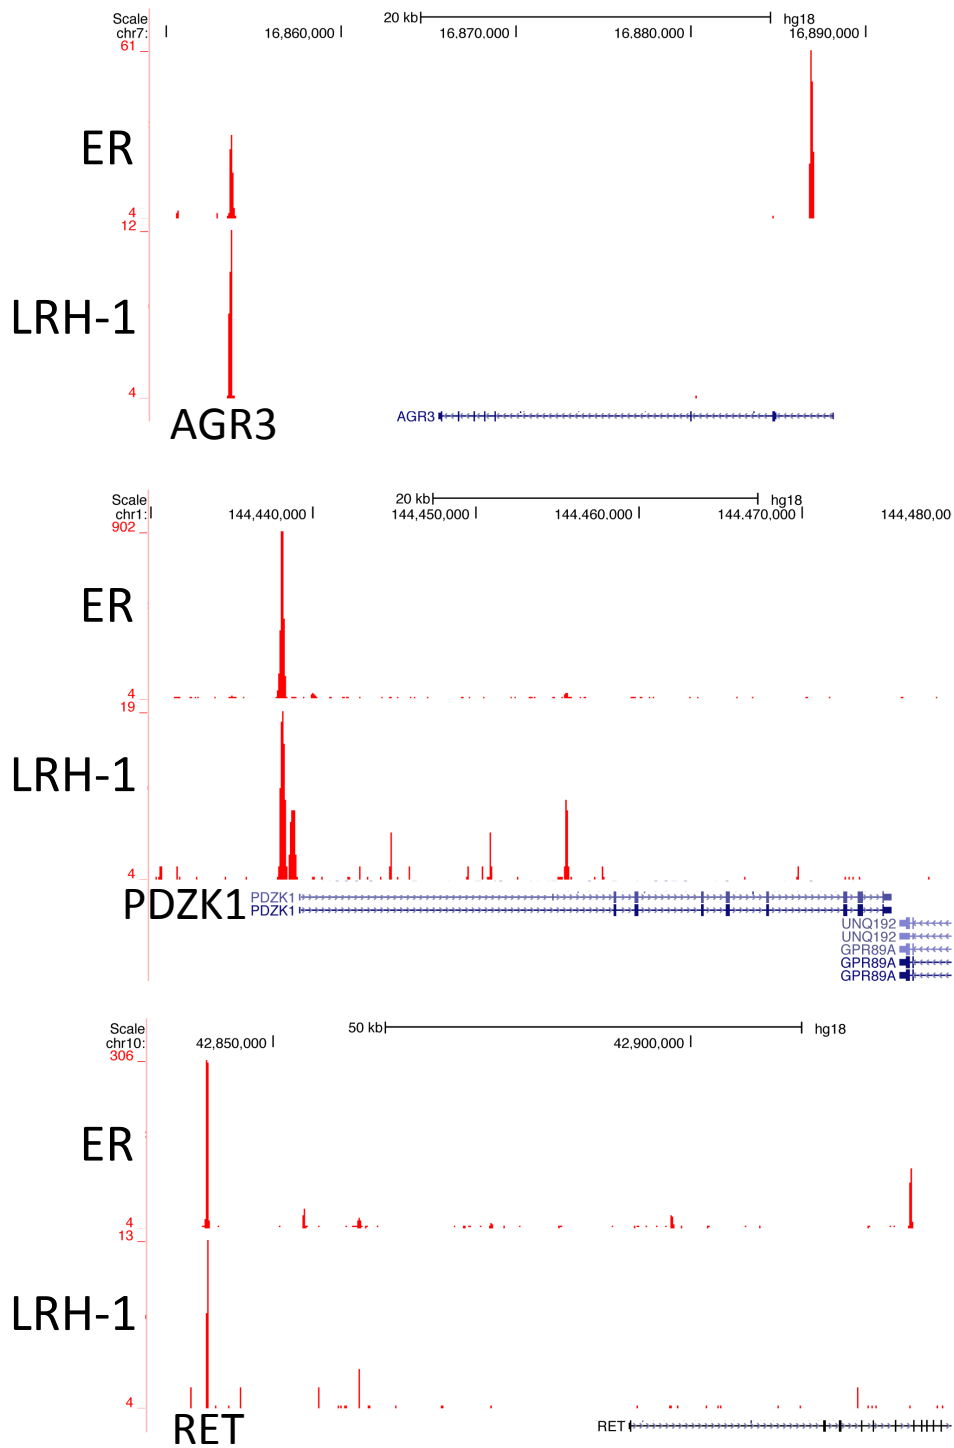

Supplementary Figure 7. Genome browser snapshots of ChIP-seq samples for ER $\alpha$  and LRH-1 on proliferating cells.

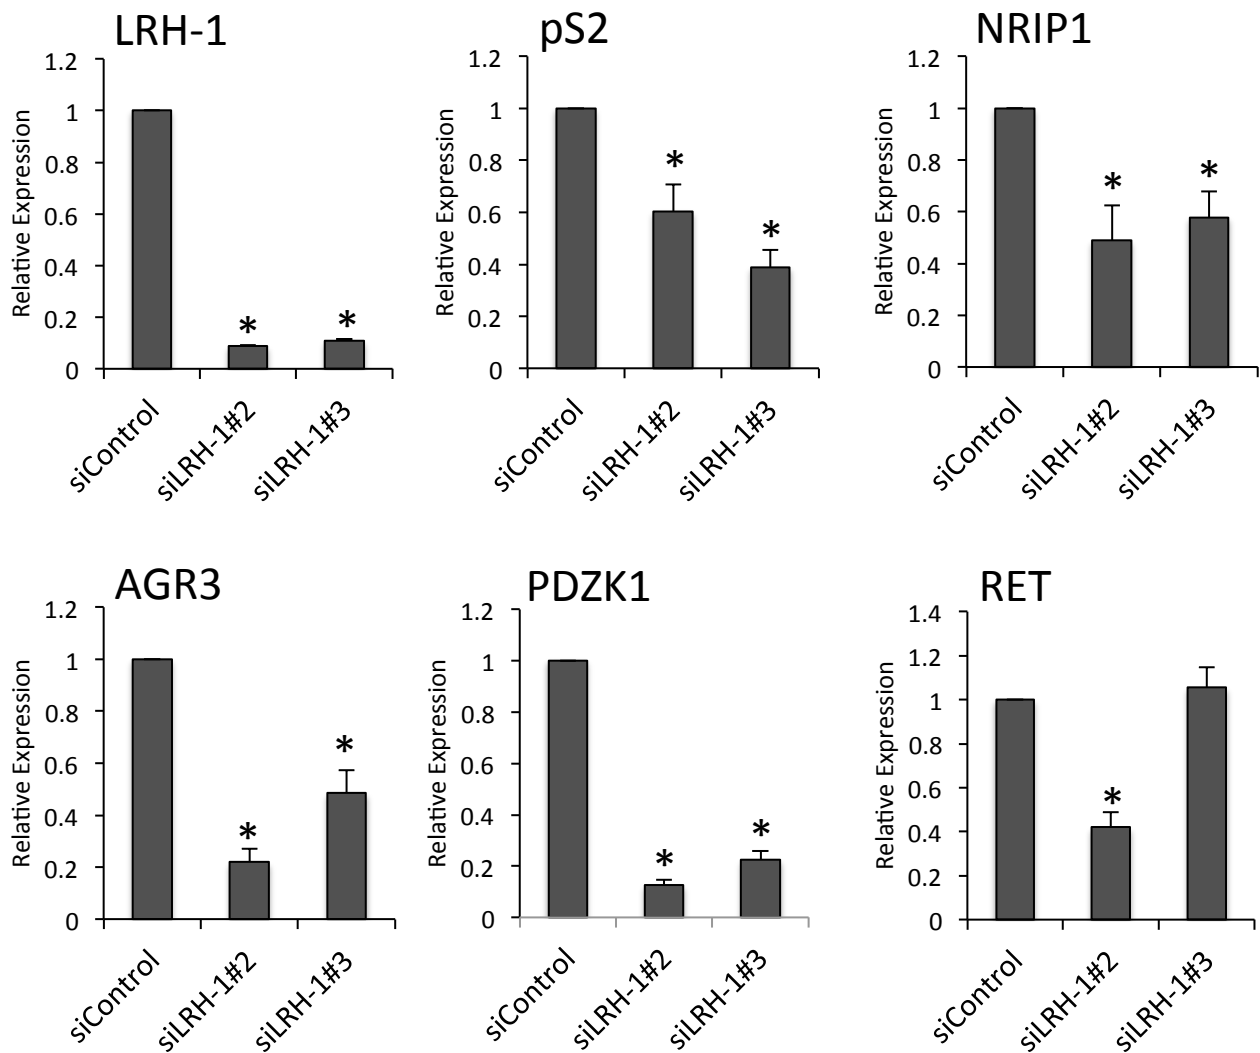

Supplementary Figure 8. Quantitative RT-PCR was performed using RNA prepared from MCF-7 cells were transfected with two siRNAs targeting LRH-1. Expression is shown relative to siControl, following normalization against GAPDH expression (n=3, error bars = SEM, \* =  $p < 0.05$  for siLRH-1 compared with siControl transfections).



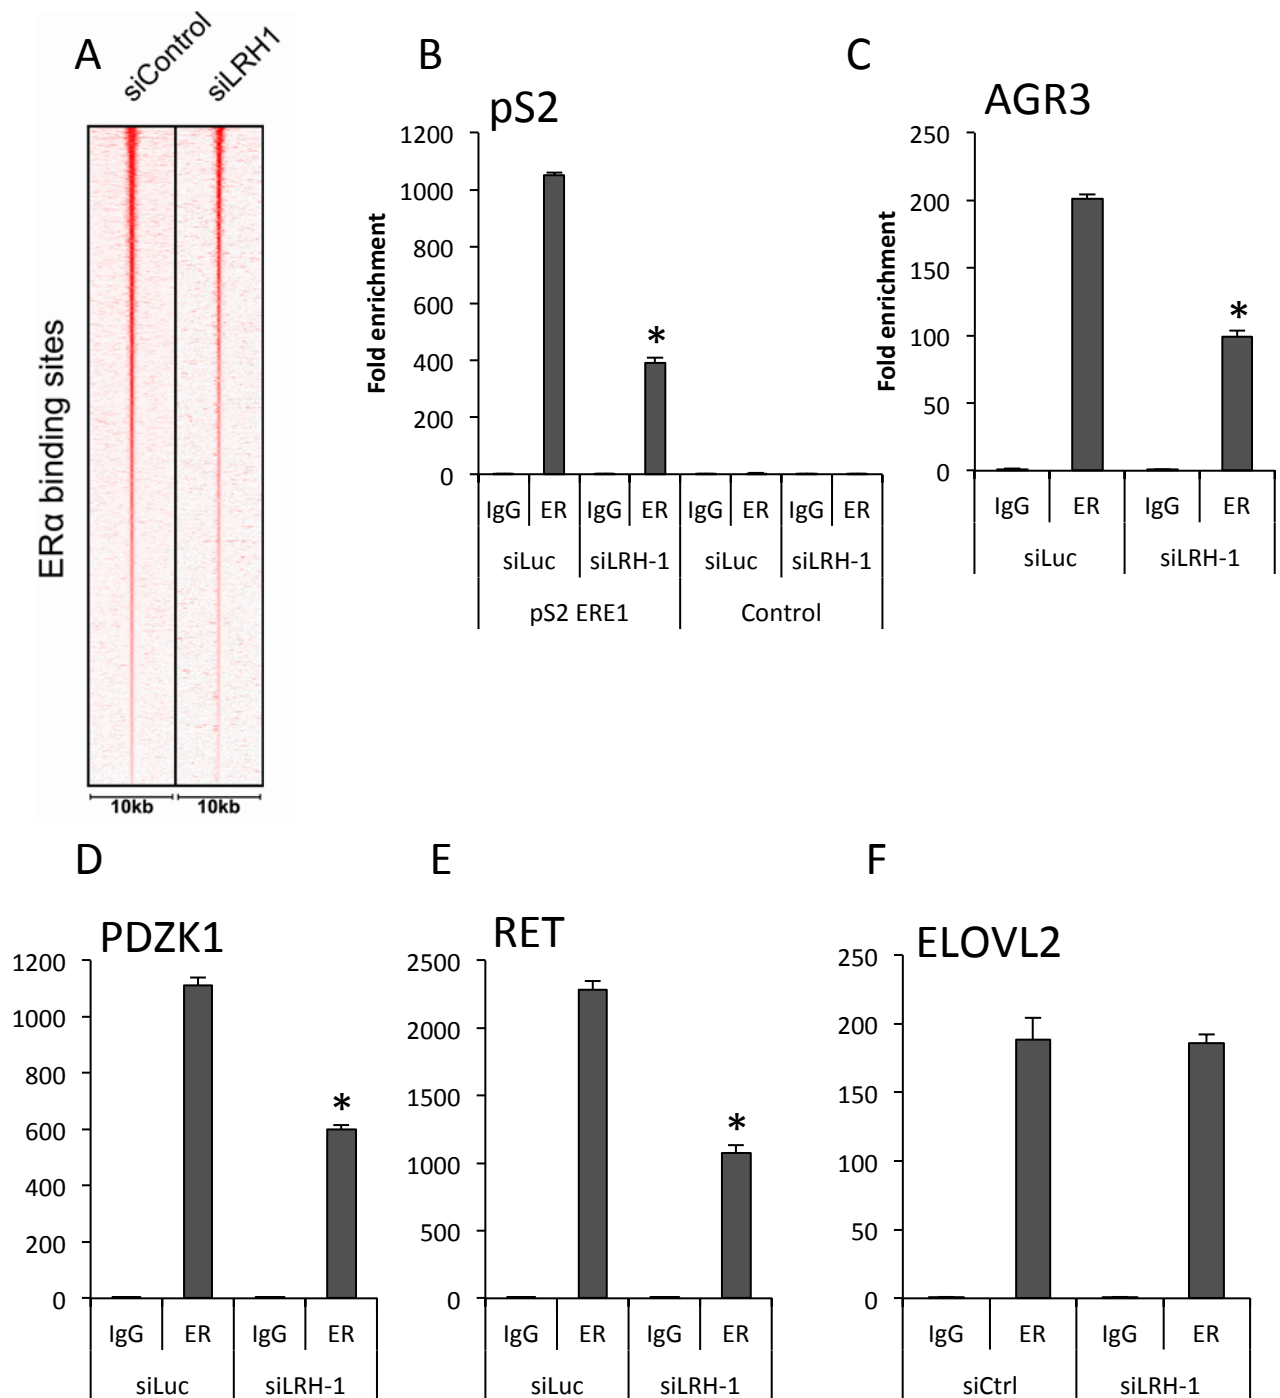

Supplementary Figure 9. (A) ChIP-seq for ERα was performed following MCF-7 cell transfection with siControl or siLRH-1 (n=3). Heatmap depicting all the ERα binding is shown, with a window of 10 kb around the binding sites. (B-F) ChIP for ERα using primers flanking the ERα binding regions highlighted in Figure 4D is shown (n=3; error bars = SEM). \* represents significant (p<0.01) differences between ER binding for siLRH-1, compared with siLuc transfections.

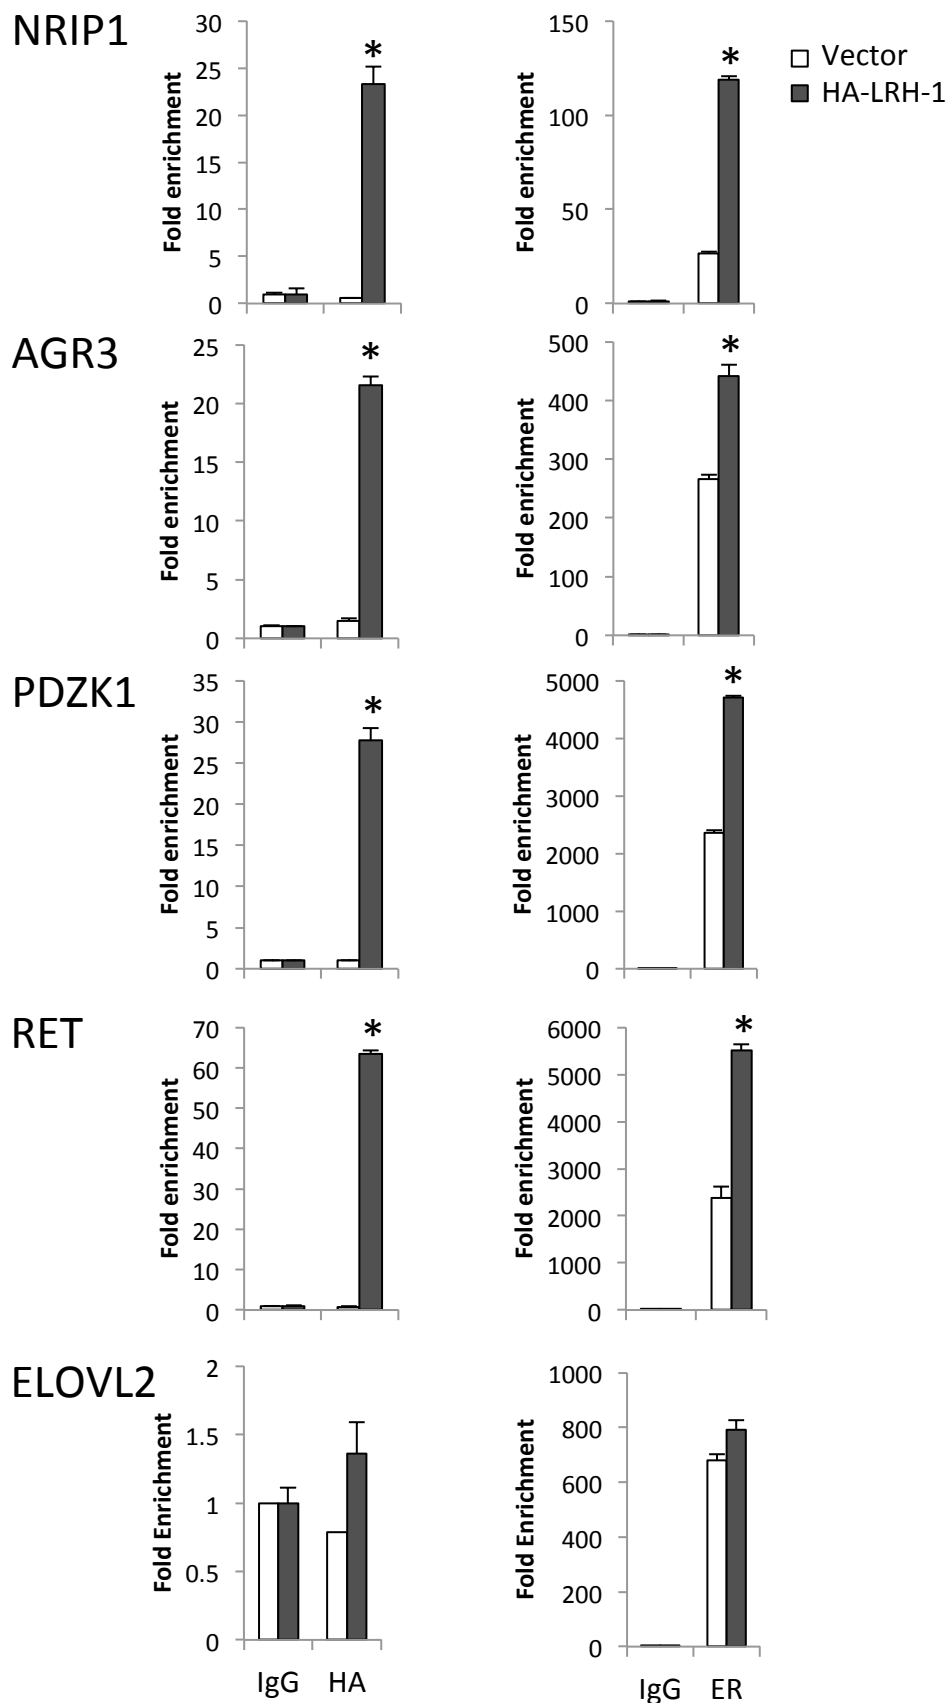

Supplementary Figure 10. LRH-1 ChIP using MCF-7 lysates is shown. ER $\alpha$  ChIP with these lysates is shown in Figure 4E. \* denotes significant ( $p < 0.01$ ) differences between vector control and LRH-1 transfected samples ( $n=3$ ).

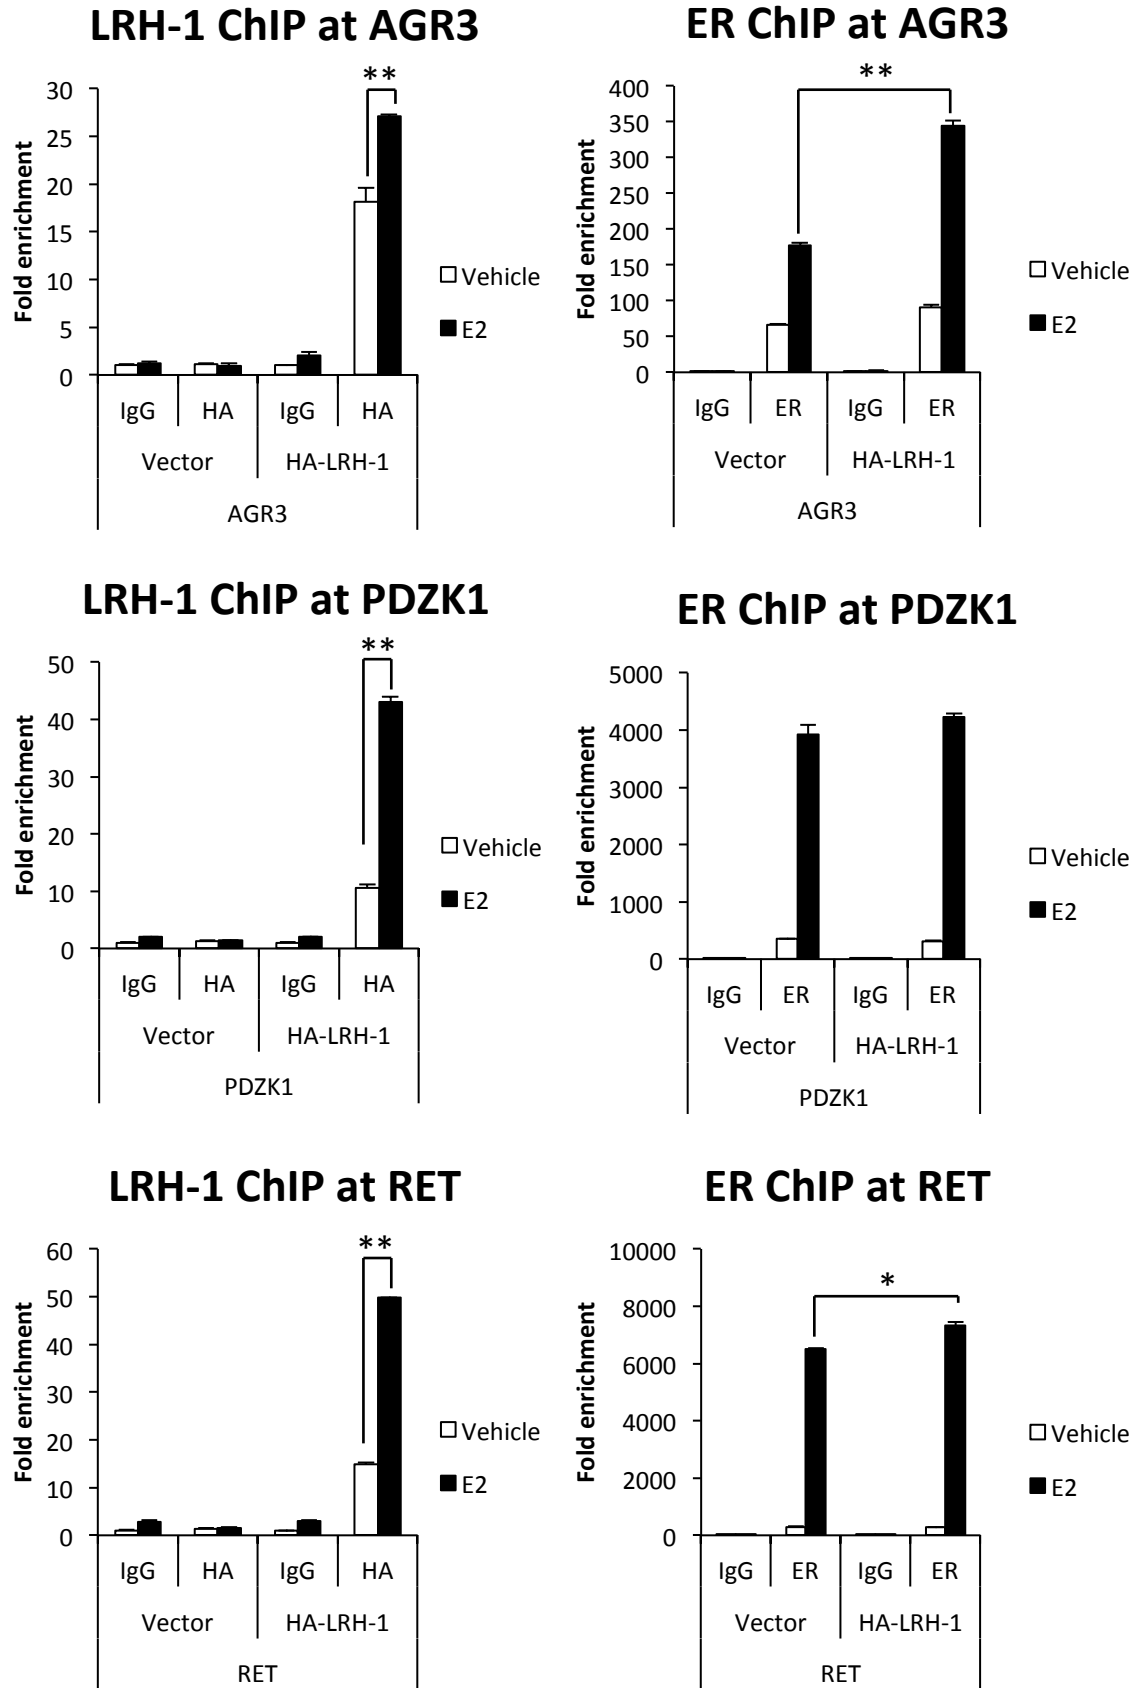

Supplementary Figure 11. Q-PCR was performed following ChIP as described in the legend to Figure 6. \*\* $p < 0.01$ , \* $p < 0.05$ .

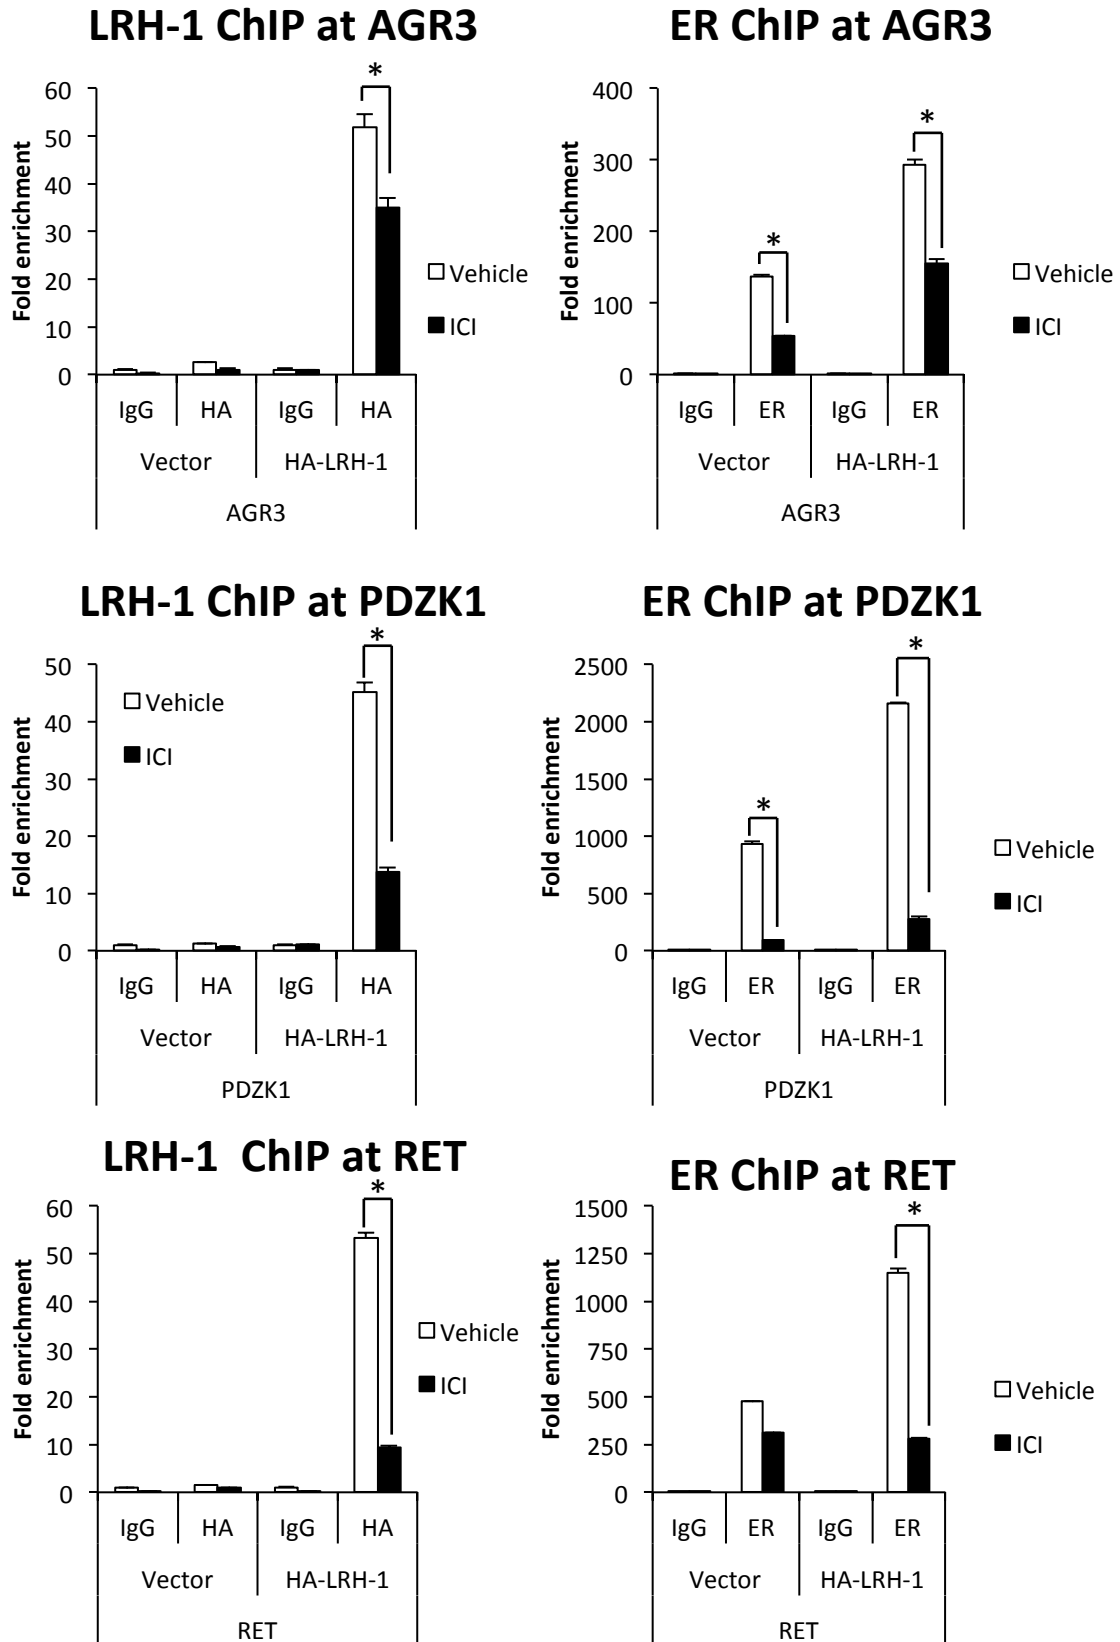

Supplementary Figure 12. Q-PCR was performed following ChIP as described in the legend to Figure 6. ICI = ICI182780. \*  $p < 0.01$ .

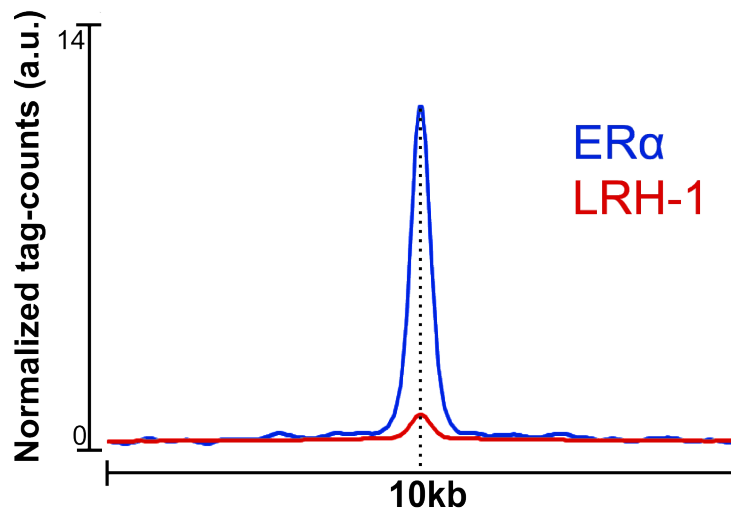

Supplementary Figure 13. 2D graph visualization of the normalized tag-count (a.u.) of ER $\alpha$  (blue) and LRH-1 (red) CHIP-seq signal at chromatin binding sites, selectively ER $\alpha$  unique sites. Although the peak calling algorithm does not identify LRH-1 binding at these sites, low intensity signal was observed. Dotted line indicated the centre of the peak region.

## Supplementary Information – Lai et al

### Sequences of oligonucleotides used for the Electrophoretic Mobility Shift Assay (EMSA)

|                     |                                                                                                                              |
|---------------------|------------------------------------------------------------------------------------------------------------------------------|
| <u>pS2 ERE:</u>     | 5' -gatcCCCT <b>GCAAGGTCACGGTGGCCA</b> CCCCGTGA-3'<br>5' -gatcTCACGGGG <b>TGGCCACCGTGACCTTGC</b> AGGG-3'                     |
| <u>pS2 EREm1:</u>   | 5' -gatcCCCT <b>GgtAGGTCACGGTGGCCA</b> CCCCGTGA-3'<br>5' -gatcTCACGGGG <b>TGGCCACCGTGACCTac</b> CAGGG-3'                     |
| <u>pS2 EREm2:</u>   | 5' -gatcCCCT <b>GCAAccTCACGGTGGCCA</b> CCCCGTGA-3'<br>5' -gatcTCACGGGG <b>TGGCCACCGTGAaggT</b> GCAGGG-3'                     |
| <u>pS2 EREm3:</u>   | 5' -gatcCCCT <b>GCAAGGTCACGGTGGgg</b> ACCCCCGTGA-3'<br>5' -gatcTCACGGGG <b>TcccACCGTGACCTTGC</b> AGGG-3'                     |
| <u>pS2 EREm4:</u>   | 5' -gatcCCCT <b>GCAAccTCACGGTGGgg</b> ACCCCCGTGA-3'<br>5' -gatcTCACGGGG <b>TcccACCGTGAaggT</b> GCAGGG-3'                     |
| <u>NRIP1 ERE:</u>   | 5' -CAGC <b>TCAAGGTCACACTA</b> ACCCGCCCT-3'<br>5' -AGGGC <b>GGGTTAGTGTGACCTT</b> GAGCTG-3'                                   |
| <u>NRIP1 EREm1:</u> | 5' -CAGC <b>TgtAGGTCACACTA</b> ACCCGCCCT-3'<br>5' -AGGGC <b>GGGTTAGTGTGACCTac</b> AGCTG-3'                                   |
| <u>NRIP1 EREm1:</u> | 5' -CAGC <b>TCAAttTCACACTA</b> ACCCGCCCT-3'<br>5' -AGGGC <b>GGGTTAGTGTGAaaT</b> GAGCTG-3'                                    |
| <u>vit ERE:</u>     | 5' -gatcCAAAGTC <b>AGGTCACAGTGACCT</b> GATCAAAGA-3'<br>5' -gatcTCTTTGATC <b>AGGTCACTGTGACCT</b> GACTTTG-3'                   |
| <u>vit EREm1:</u>   | 5' -gatcCAAAGTC <b>AccTCACAGTGACCT</b> GATCAAAGA-3'<br>5' -gatcTCTTTGATC <b>AGGTCACTGTGAaggT</b> GACTTTG-3'                  |
| <u>vit EREm2:</u>   | 5' -gatcCAAAG <b>Gca</b> <b>AGGTCACAGTGACCT</b> GATCAAAGA-3'<br>5' -gatcTCTTTGATC <b>AGGTCACTGTGACCT</b> <b>tg</b> CCTTTG-3' |
| <u>vit EREm3:</u>   | 5' -gatcCAAAt <b>ca</b> <b>AGGTCACAGTGACCT</b> GATCAAAGA-3'<br>5' -gatcTCTTTGATC <b>AGGTCACTGTGACCT</b> <b>tga</b> TTTG-3'   |
| <u>AFP:</u>         | 5' -CTATCTTATGT <b>TCAAGGACA</b> AAGACCACTTC-3'<br>5' -GAAGTGGTCTT <b>TGTCCTTGA</b> ACATAAGATAG-3'                           |
| <u>AFPm1:</u>       | 5' -CTATCTTATGT <b>TgtAGGACA</b> AAGACCACTTC-3'<br>5' -GAAGTGGTCTT <b>TGTCCTacA</b> ACATAAGATAG-3'                           |

## Sequences of Oligonucleotides used to generate pS2-luc mutants by Site-Directed Mutagenesis

pS2-EREm1-luc 5' -TCCCTTCCCCCTGgtAGGTCACGGTGGCC-3'

pS2-EREm2-luc 5' -TCCCTTCCCCCTGCAAccTCACGGTGGCC-3'

pS2-EREm3-luc 5' -AAGGTCACGGTGGttACCCCGTGAGCCA-3'

Mutagenesis of pS2-EREm2-luc was performed to generate pS2-EREm4-luc using an oligonucleotide

pS2-EREm4-luc 5' -AAccTCACGGTGGttACCCCGTGAGCCA-3'

## Sequences of PCR Primers used for Chromatin immunoprecipitation (ChIP):

pS2 ERE: 5' -TATGAATCACTTCTGCAGTGAG-3'  
5' -GAGCGTTAGATAACATTTGCC-3'

Control: 5' -GTGATTCTCCTGACTTAACC-3'  
5' -TGGCGCAGTGGCTCACGCTG-3'

NRIP1: 5' -CTGCCCCATTCTTTGTGATT-3'  
5' -TAGCAGGATCTGTGCCAGTG-3'

AGR3: 5' -TTTGAGCTGCCCTGTGCTAA-3'  
5' -GCTGATGGCATTTTGGCCTC-3'

PDZK1 5' -AGGCCAGCAAAGACAAATG-3'  
5' -AAACCACAGGCTGAGGACTG-3'

RET 5' - CTGAGGGCGCAGAGATACAG-3'  
5' - TGACTCAGCCAGTCTCACCT-3'

## Real-time RT-PCR Assays

| Gene Name                           | ABI Assay Catalogue Number |
|-------------------------------------|----------------------------|
| <u>LRH-1 (NR5A2)</u>                | Hs00892377_m1              |
| <u>ER<math>\alpha</math> (ESR1)</u> | Hs00174860_m1              |
| <u>pS2 (TFF1)</u>                   | Hs00170216_m1              |
| <u>GREB1</u>                        | Hs00536409_m1              |
| <u>NRIP1</u>                        | Hs00942766_m1              |
| <u>Cathepsin D (CTSD)</u>           | Hs00157201_m1              |
| <u>AGR3</u>                         | Hs00411268_m1              |
| <u>PDZK1</u>                        | Hs00275727_m1              |
| <u>RET</u>                          | Hs01120030_m1              |
| <u>GAPDH</u>                        | Hs99999905_m1              |

**Antibodies**

|                                     | <b>Applications</b>  | <b>Catalogue Number</b> | <b>Supplier</b>            |
|-------------------------------------|----------------------|-------------------------|----------------------------|
| <b>ER<math>\alpha</math> (ESR1)</b> | ChIP                 | sc-543                  | Santa Cruz                 |
| <b>HA</b>                           | ChIP                 | 04-902                  | Millipore                  |
| <b>GATA3</b>                        | ChIP, Immunoblotting | sc-268                  | Santa Cruz                 |
| <b>FOXA1</b>                        | ChIP, Immunoblotting | ab5089, ab23738         | Abcam                      |
| <b>RNA polymerase II (PolII)</b>    | ChIP, Immunoblotting | 05-623                  | Millipore                  |
| <b>CBP</b>                          | ChIP, Immunoblotting | sc-369                  | Santa Cruz                 |
| <b>p300</b>                         | ChIP, Immunoblotting | sc-585                  | Santa Cruz                 |
| <b>AIB1</b>                         | ChIP, Immunoblotting | 611105                  | BD Biosciences             |
| <b>Ac-H3K9</b>                      | ChIP                 | ab4441                  | Abcam                      |
| <b>Ac-H3K27</b>                     | ChIP                 | ab4729                  | Abcam                      |
| <b>Histone H3</b>                   | ChIP                 | ab1791                  | Abcam                      |
| <b>IgG</b>                          | ChIP                 | #2729                   | Cell Signalling            |
| <b>LRH-1</b>                        | Immunoblotting       | PP-H2325-00             | Perseus Proteomics         |
| <b>ER<math>\alpha</math> (ESR1)</b> | Immunoblotting       | NCL-ER-6F11             | Novacastra<br>Laboratories |
| <b>HA</b>                           | Immunoblotting       | sc-7392                 | Santa Cruz                 |
| <b>TFF1 (pS2)</b>                   | Immunoblotting       | sc-28925                | Santa Cruz                 |
| <b><math>\beta</math>-actin</b>     | Immunoblotting       | ab6276                  | Abcam                      |
